# Supplementary material
Source: Springer Nature journal article supplement (https://www.springermedizin.de/resource/supplementary/12958_2011_967_MOESM2_ESM.pdf/9566466)

(A)

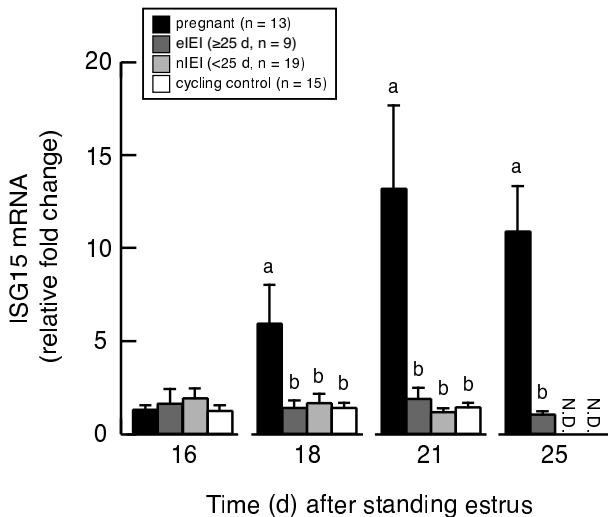

(B)

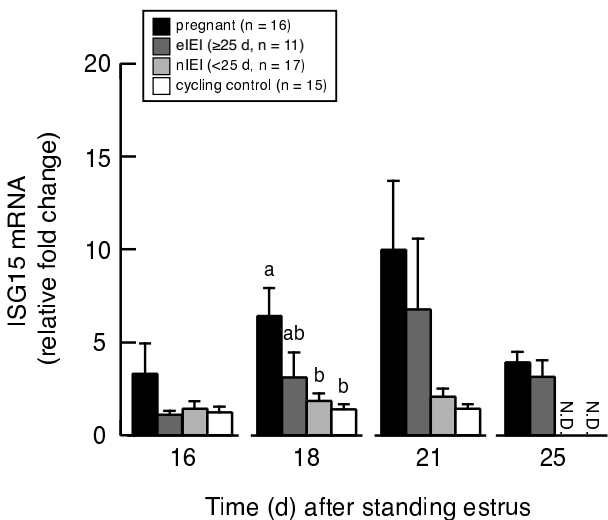

Supplement: MOESM2 [file 9566466]
